# Supplementary material for: ZnO as an efficient nucleating agent and morphology template for rapid, facile and scalable synthesis of MOF-46 and ZnO@MOF-46 with selective sensing properties and enhanced photocatalytic ability
Source: Royal Society of Chemistry journal article supplement (doi:10.1039/c6ra12410k), 2016-01-01
Supplement: c6ra12410k1.pdf [file c6ra12410k1.pdf]

## Supported Information

### **ZnO as an efficient nucleating agent and morphology template for rapid, facile and scalable synthesis of MOF-46 and ZnO@MOF-46 with selective sensing properties and the enhanced photocatalytic ability**

Maryam Rad, Saeed Dehghanpour\*

<sup>a</sup>Department of Chemistry, Alzahra University, P.O. Box 1993891176, Tehran, Iran

Table S1. Crystal data and single crystal X-ray diffraction refinement details for MOF-46

|                                           |                            |
|-------------------------------------------|----------------------------|
| Empirical formula                         | $C_{11} H_{14} N_3 O_5 Zn$ |
| Formula mass                              | 333.62                     |
| T (K)                                     | 298(2)                     |
| Wavelength ( $\text{\AA}$ )               | 0.71073                    |
| Crystal system                            | Monoclinic                 |
| Space group                               | C 2/m                      |
| a ( $\text{\AA}$ )                        | 11.2043(9)                 |
| b ( $\text{\AA}$ )                        | 15.0516(12)                |
| c ( $\text{\AA}$ )                        | 8.0275(7)                  |
| $\alpha$ ( $^\circ$ )                     | 90.00                      |
| $\beta$ ( $^\circ$ )                      | 111.7060(10)               |
| $\gamma$ ( $^\circ$ )                     | 90.00                      |
| V ( $\text{\AA}^3$ )                      | 1257.79(18)                |
| Z                                         | 4                          |
| $D_{\text{Calcd}}$ ( $\text{g cm}^{-3}$ ) | 1.762                      |
| $\mu$ ( $\text{mm}^{-1}$ )                | 1.977                      |

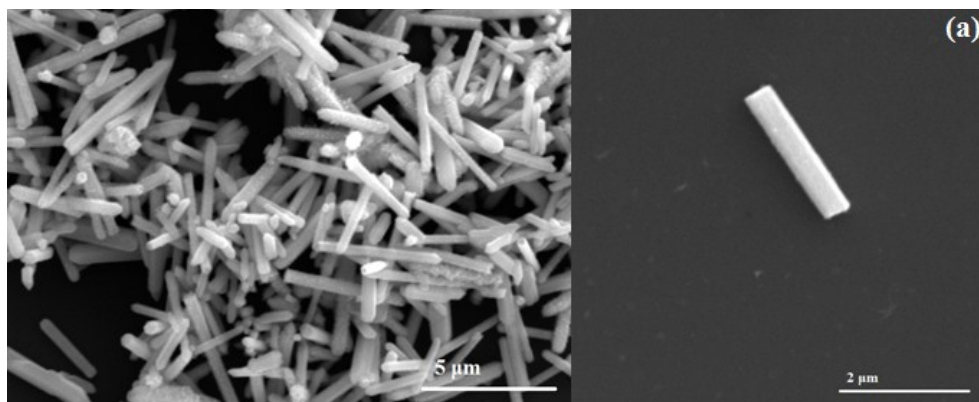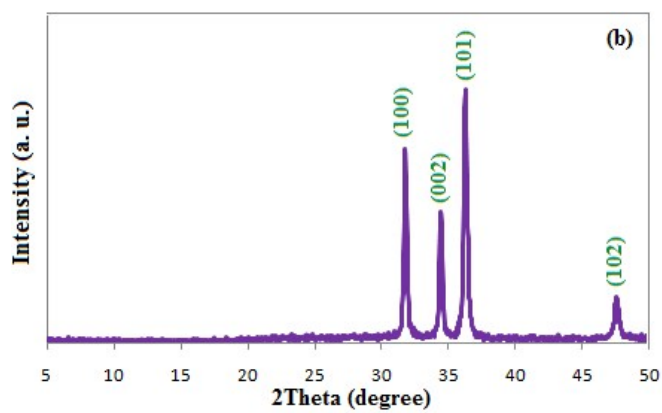

Fig.S1. (a) SEM images of ZnO synthesized by hydrothermal method after calcination at 500 °C;  
(b) XRD pattern of prepared ZnO.

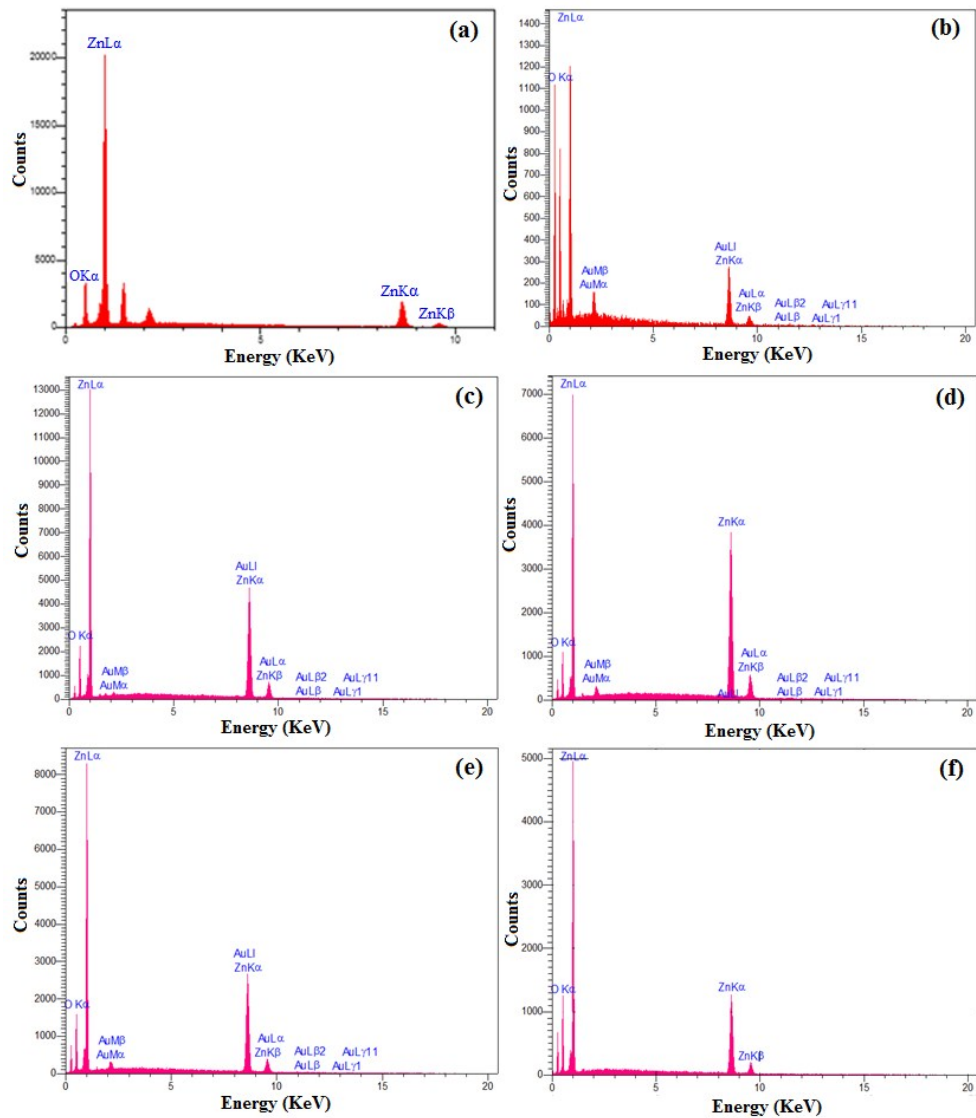

Fig. S2. Energy dispersive X-ray spectroscopy (EDX) of (a) ZnO nanorods, (b) MOF-46 microcrystals, (c) ZnO@MOF-46 prepared at 6 h, (d) ZnO@MOF-46 prepared at 12 h, (e) ZnO@MOF-46 prepared at 24 h and (f) ZnO@MOF-46 prepared at 48 h.

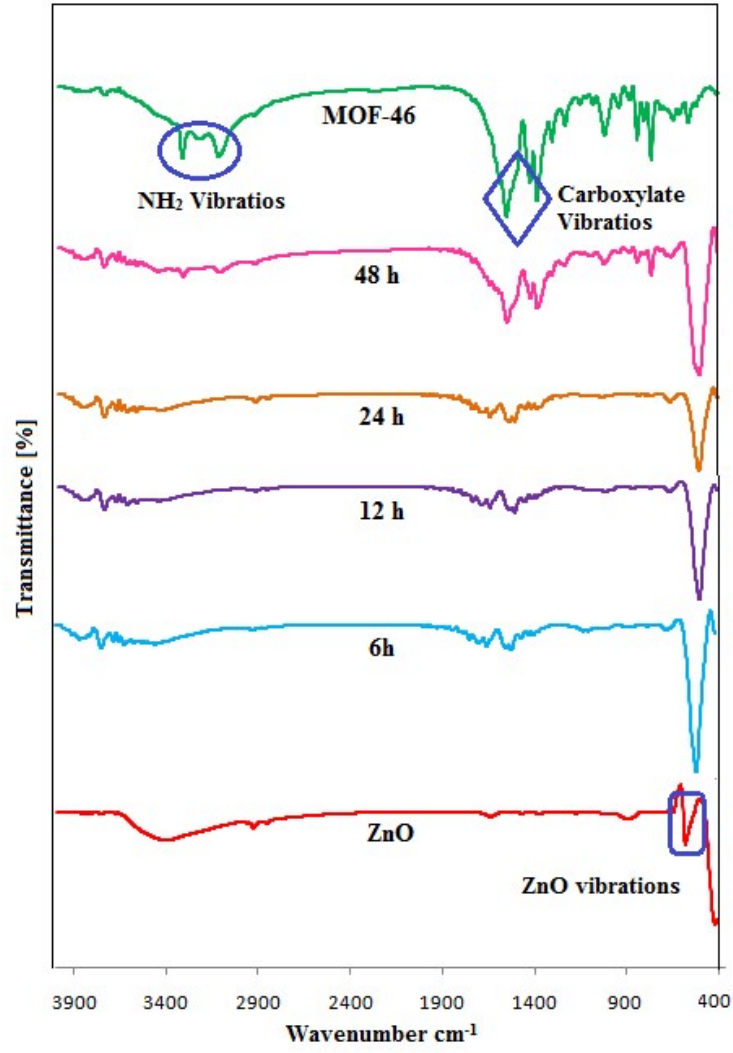

Fig. S3. IR spectra of ZnO, ZnO@MOF-46 core-shell sample prepared at 6, 12, 24 and 48h and MOF-46.

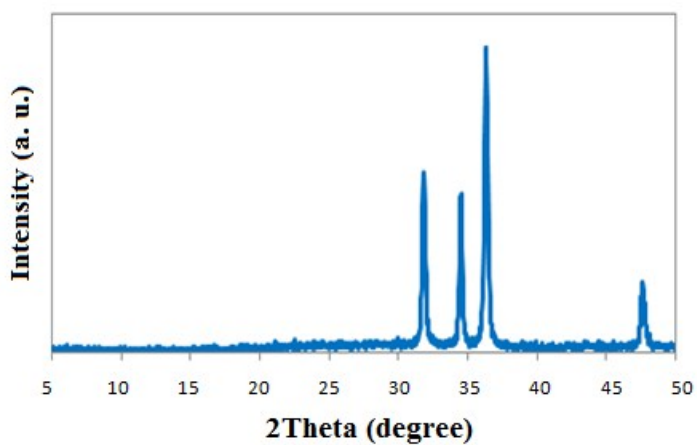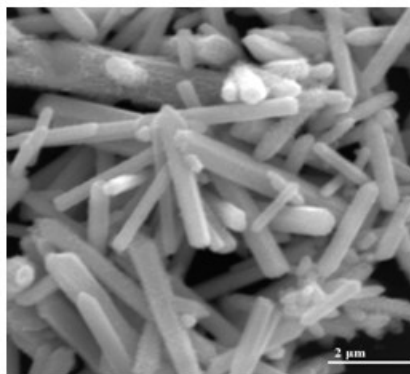

(a)

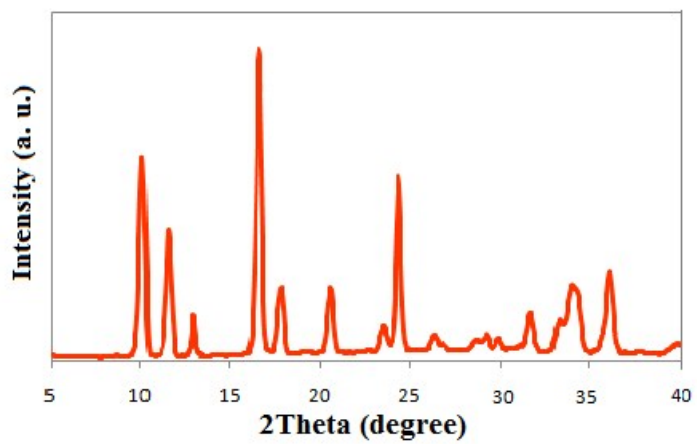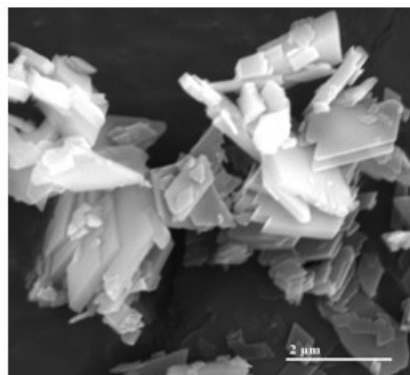

(b)

Fig. S4. XRD patterns and SEM images of sample as a function of solvents (a) only DMF (b) H<sub>2</sub>O/DMF (2:1).

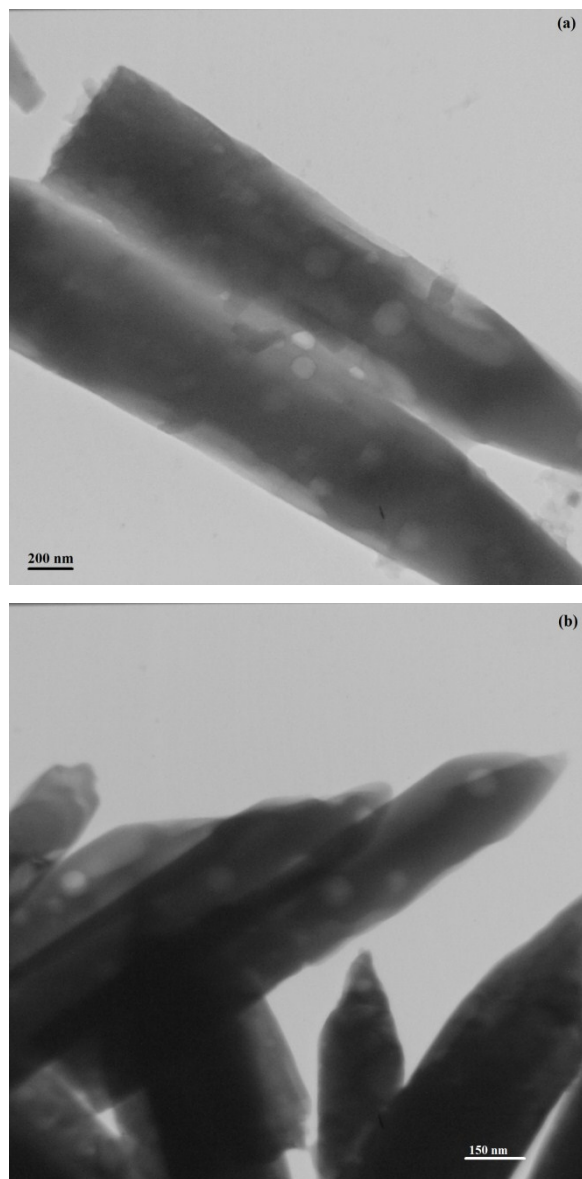

Fig. S5. ZnO@MOF-46 core-shell structures obtained during 48 h in ZnO to 2-aminoterephthalic acid molar ratio (a) 2:1 and (b) 1:2.

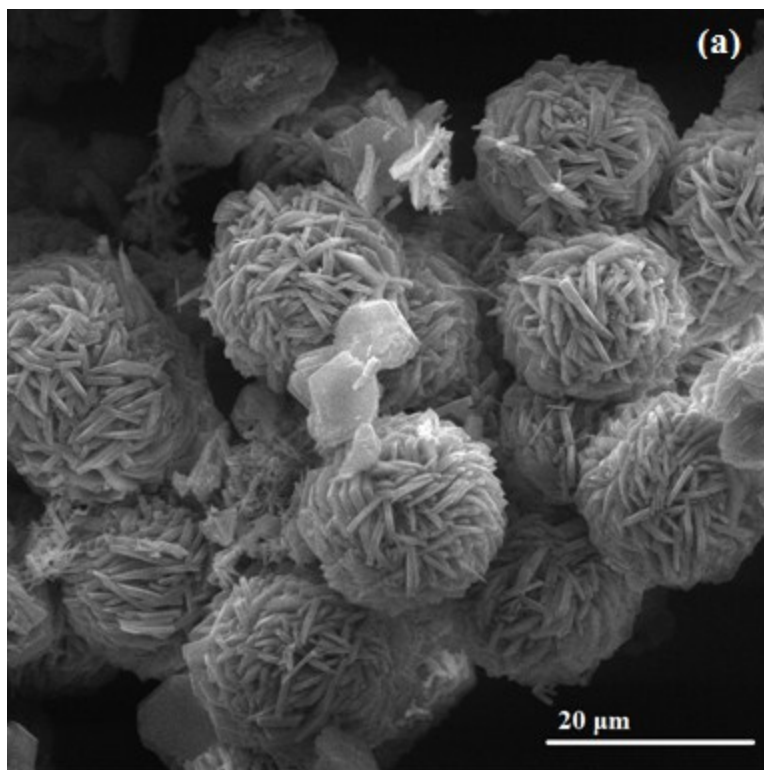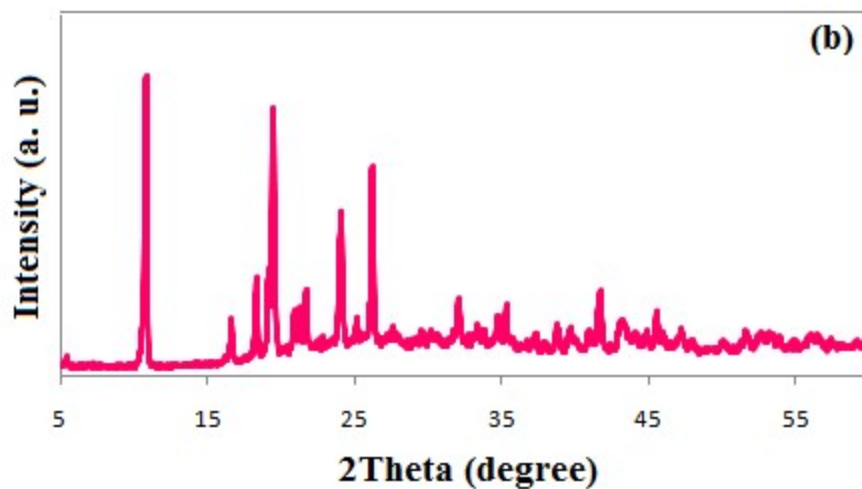

Fig. S6. (a) SEM image and (b) XRD pattern of obtained sample by solvothermal method. (Experimental condition: 2-aminoterephthalic acid (181 mg, 1 mmol) and ZnO (82.00 mg, 1mmol) into a Teflon-lined stainless-steel autoclave containing solvent composition DMF/H<sub>2</sub>O (48ml, 3:1). The autoclave was transferred to an oven and heated at 70°C for different reaction times (6, 12, 24 and 48 h)).



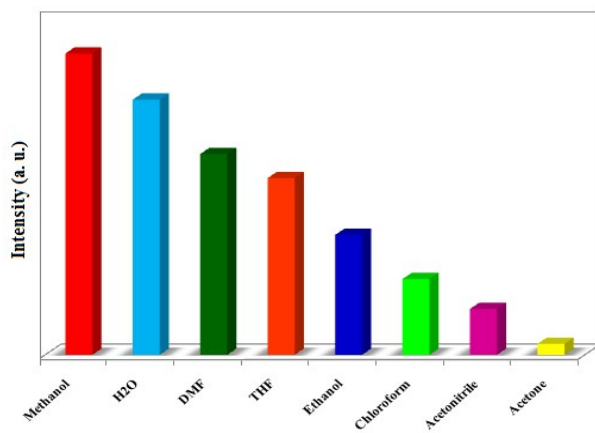

Fig. S7. Emission Intensities of ZnO@MOF-46 in different solvents.

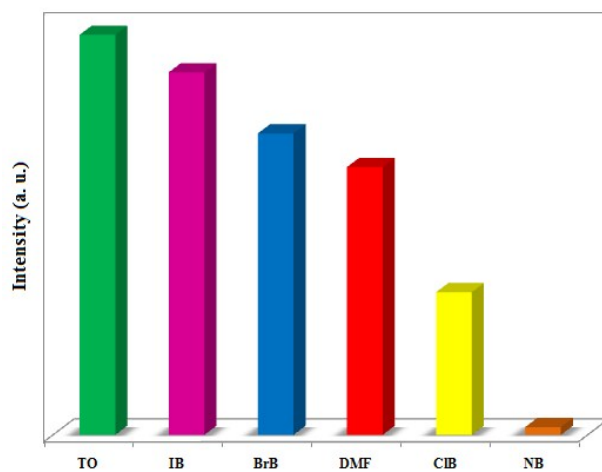

Fig. S8. Emission Intensities of ZnO@MOF-46 in DMF.

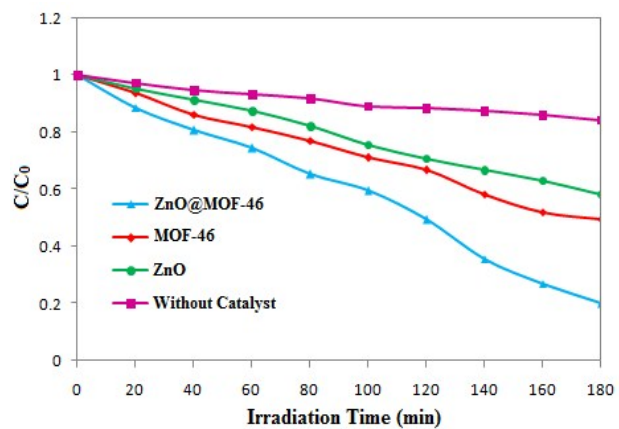

Fig. S9. Concentration changes of MB at different time intervals without catalyst and with ZnO@MOF-46, MOF-46 and ZnO as photocatalysts.

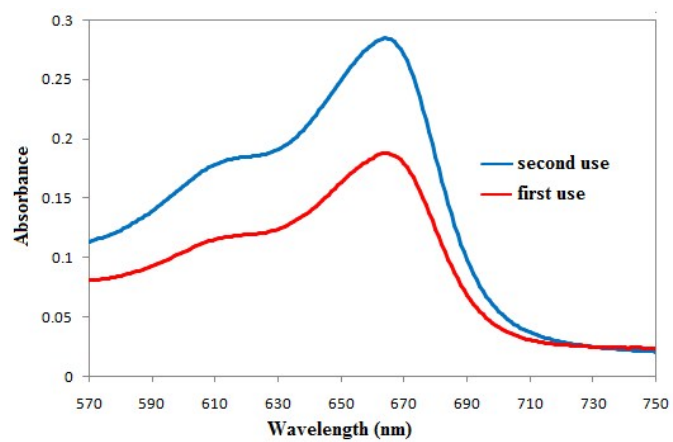

Fig. S10. Reusability of ZnO@MOF-46 in photodegradation of MB solution under Hg lamp (first use is fresh ZnO@MOF-46 cycle and second use is reused ZnO@MOF-46 cycle).

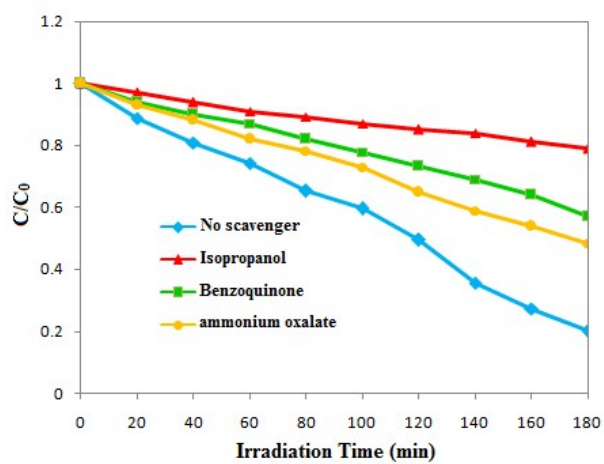

Fig. S11. Effect of different scavengers on the degradation of methylene blue in the presence of ZnO@MOF-46 as photocatalyst.

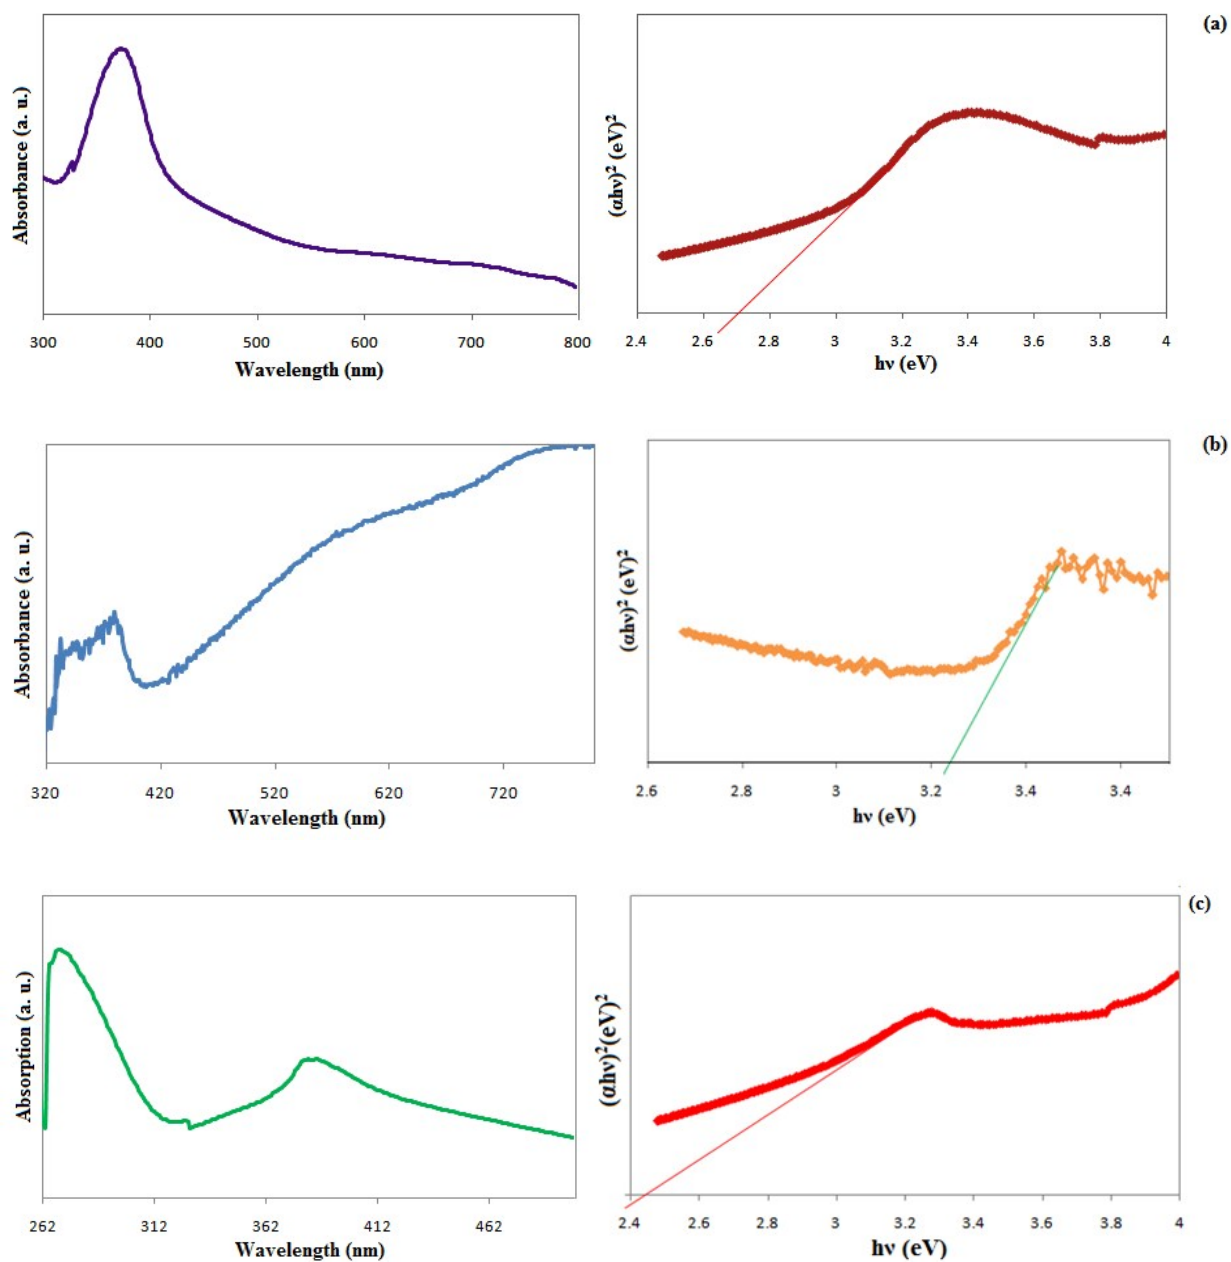

Fig. S12. UV-vis spectrum and  $(\alpha h\nu)^2 - h\nu$  curve of (a) MOF-46 and (b) ZnO rods (c) ZnO@MOF-46.

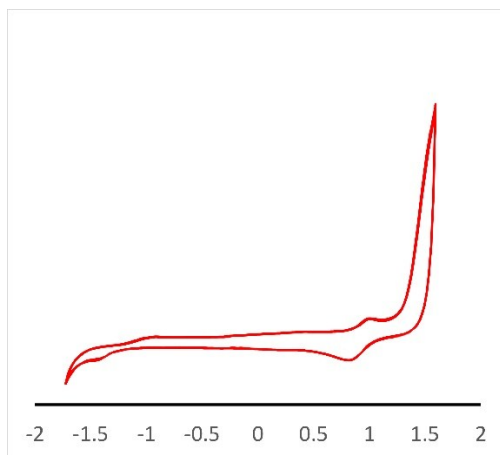

Fig. S13. Cyclic voltammetry of MOF-46.

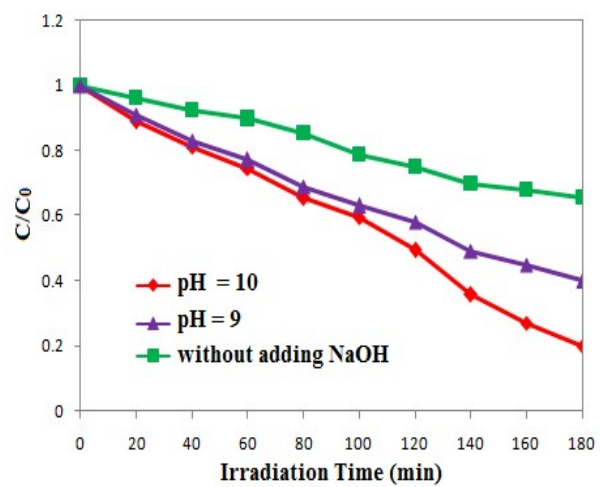

Fig. S14. Concentration changes of MB at different time intervals without adding NaOH, pH = 9 and pH = 10 with ZnO@MOF-46 photocatalyst.
